# Supplementary figures and images for: Single strand transposition at the host replication fork
Source: PubMed Central journal article supplement — Nucleic Acids Res. 2016 Jul 27;44(16):7866–83. doi: 10.1093/nar/gkw661 (PMC5027513; doi:10.1093/nar/gkw661), 2016-07-27

A)

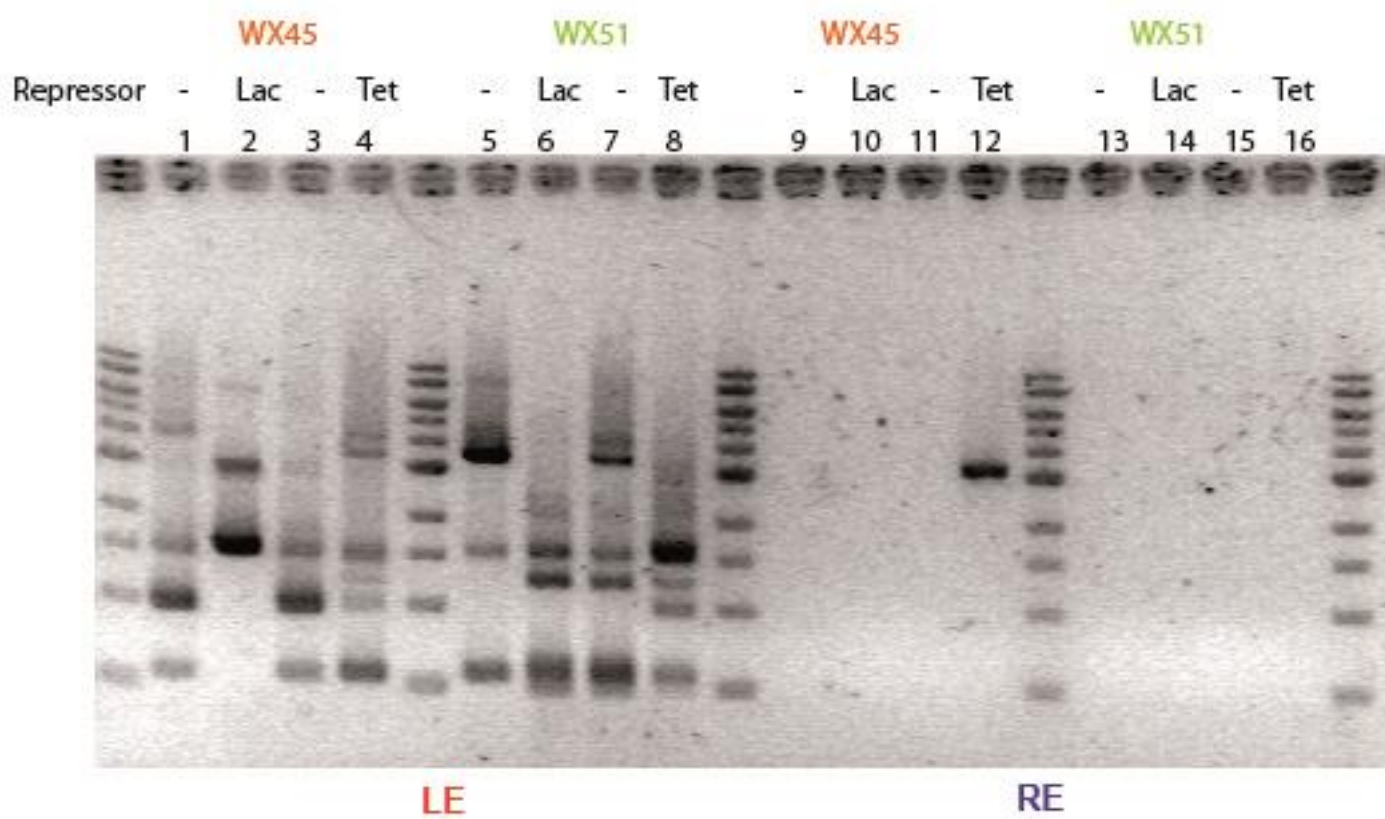

B)

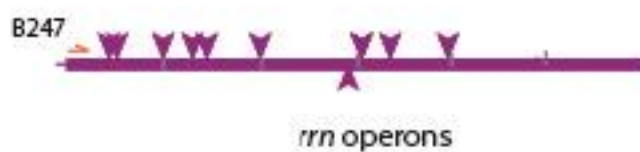

Fig S1

Fig S2

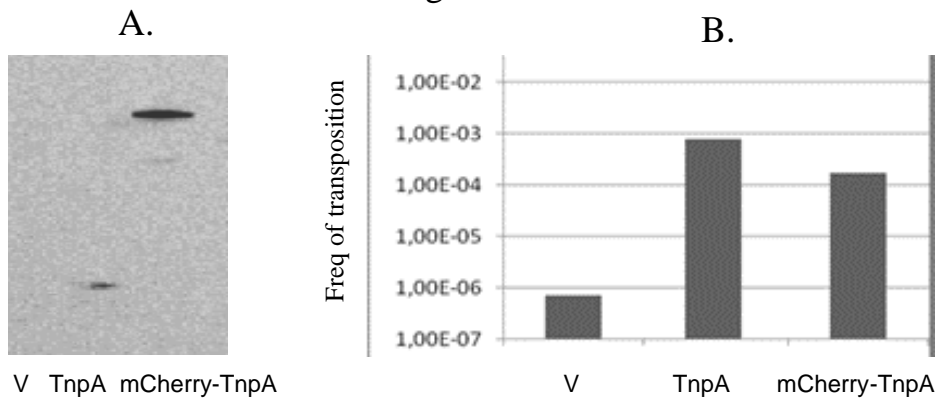

Fig S3

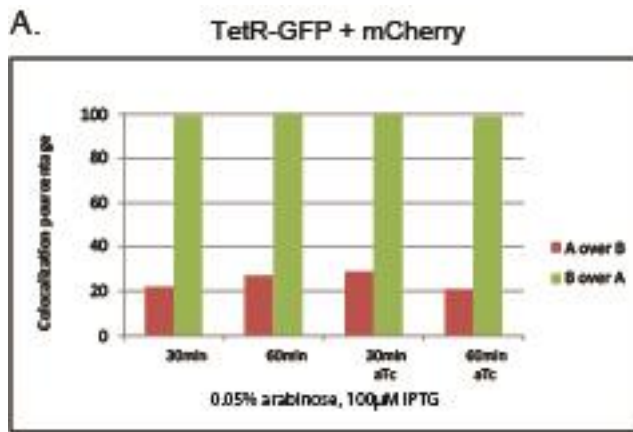

**B.**

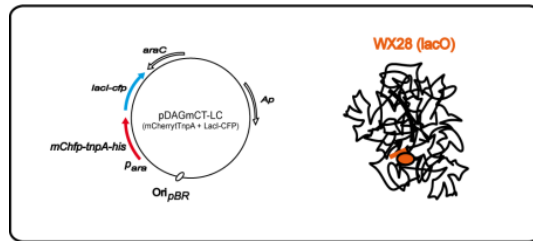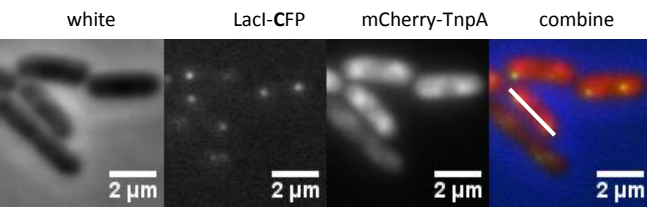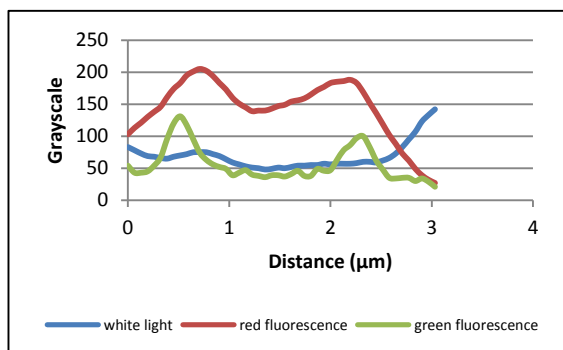

**C.**

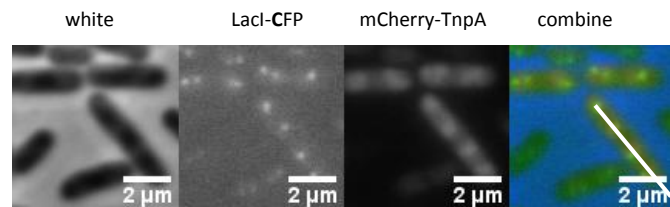

**D.**

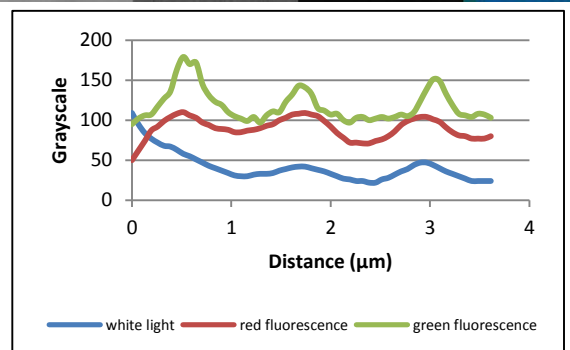

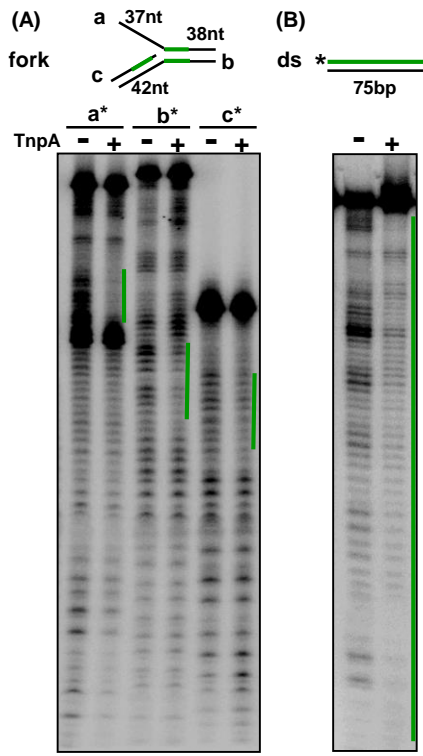

(C)

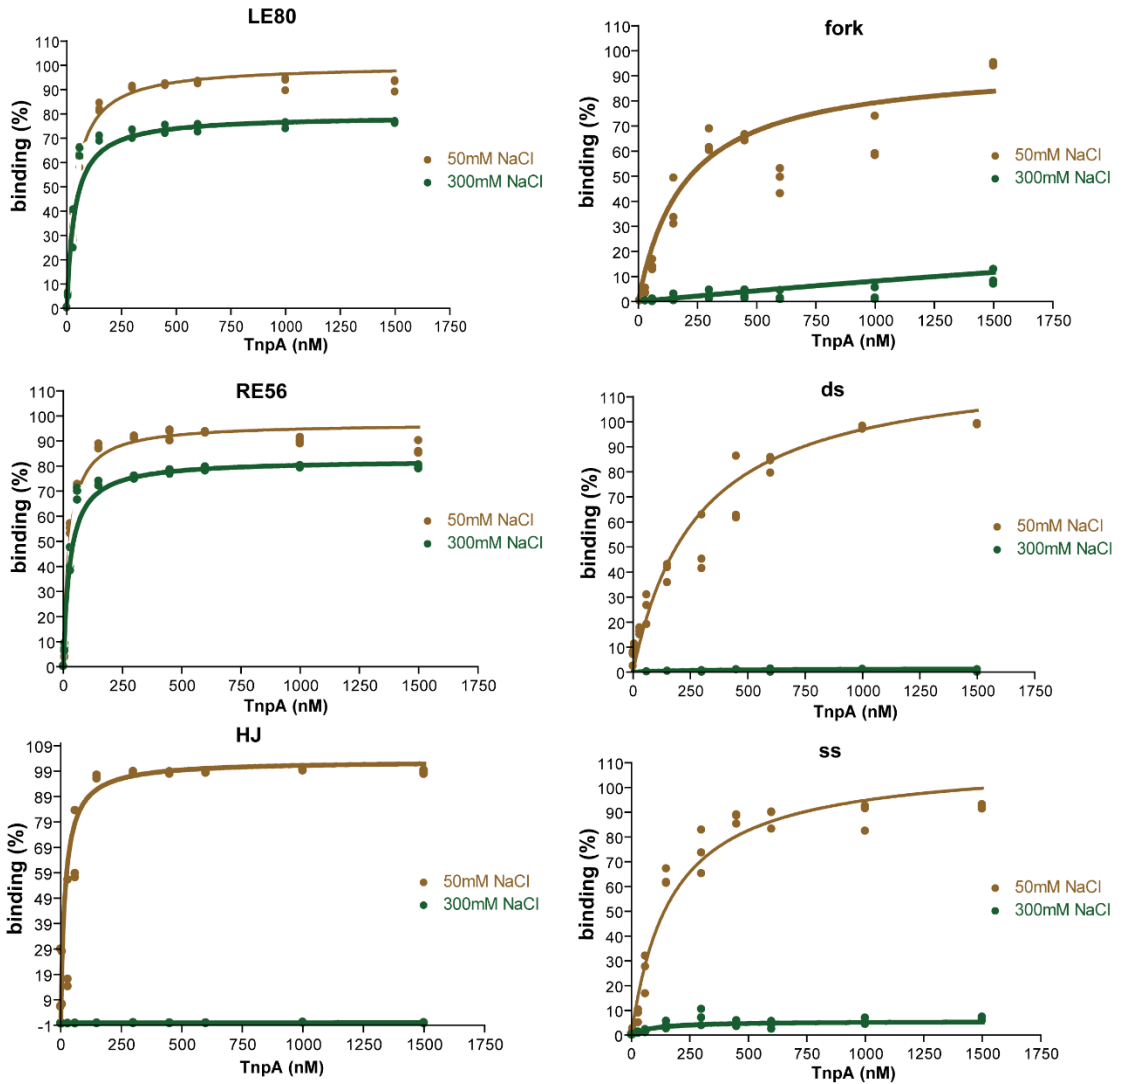

Figure S4A-C

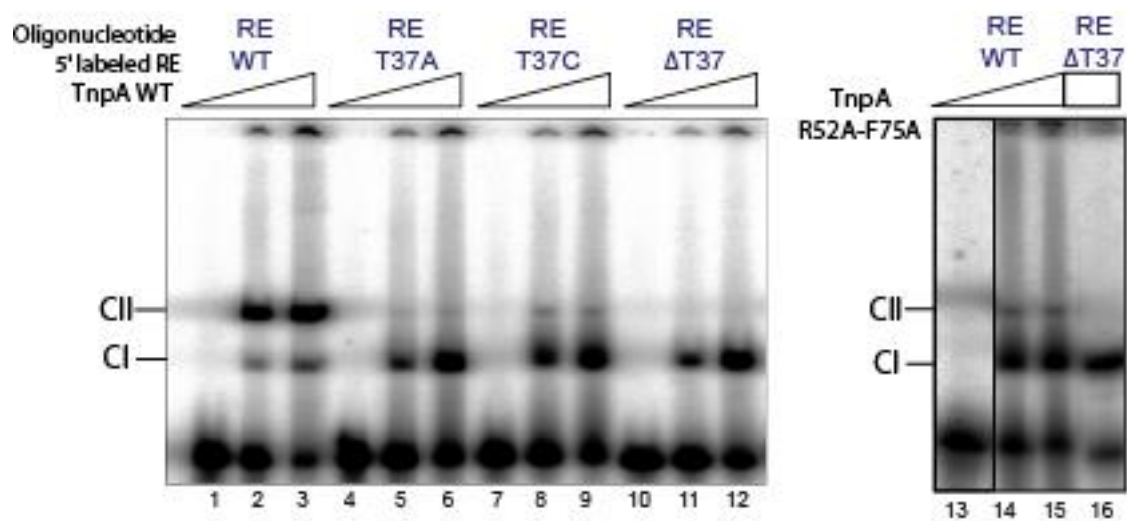

Figure S4D

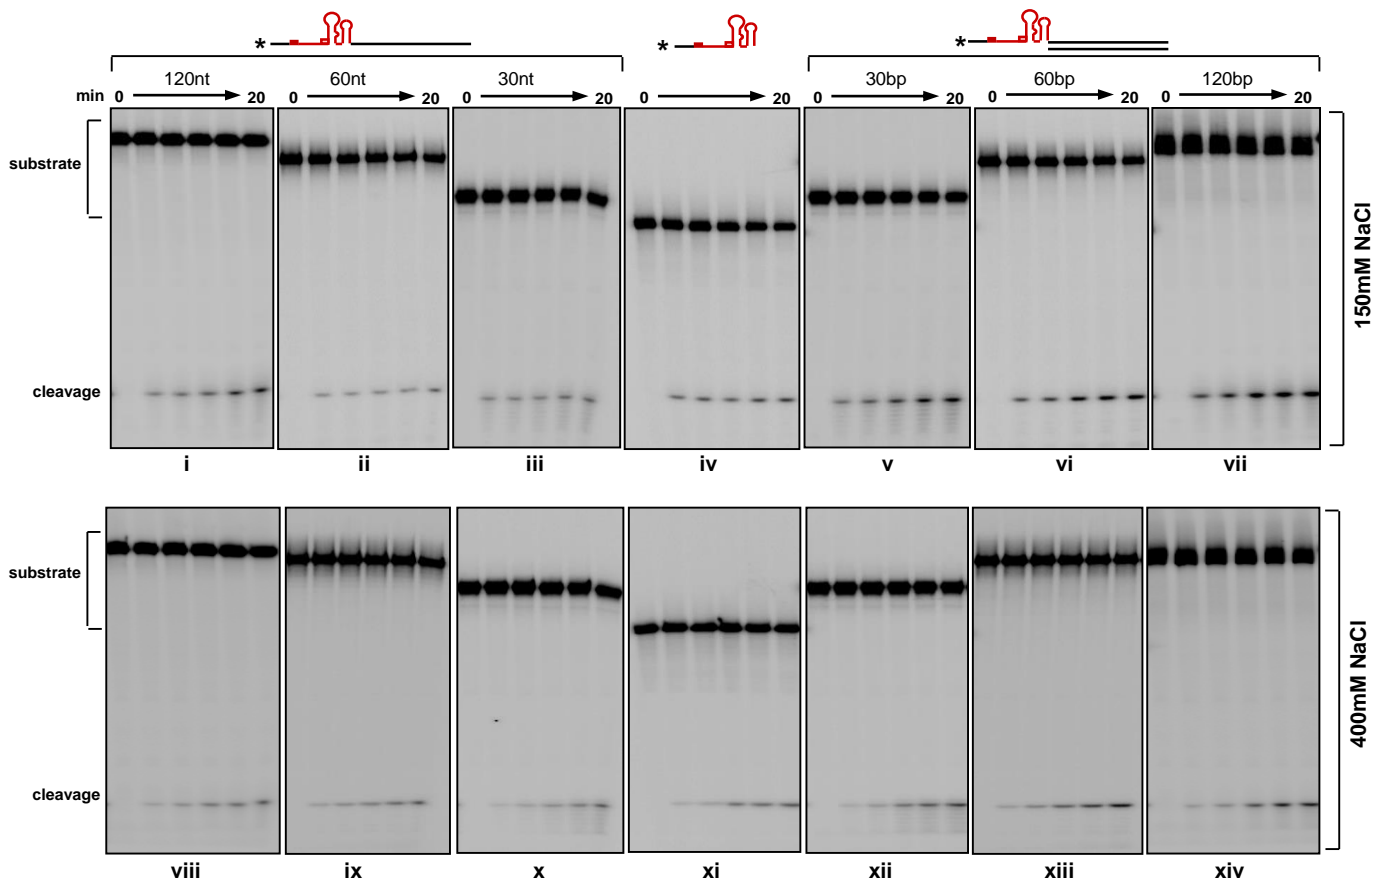

Figure S5

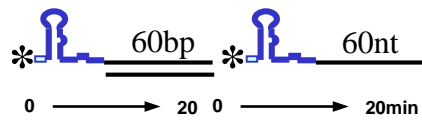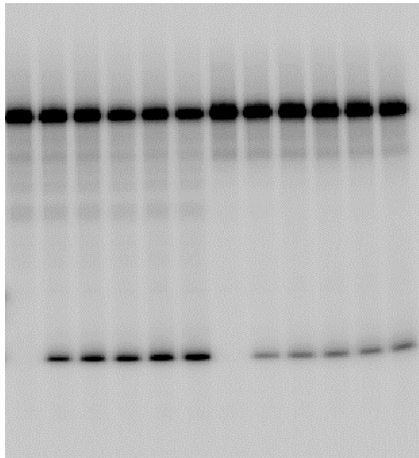

150mM NaCl

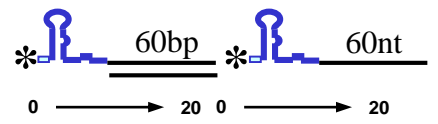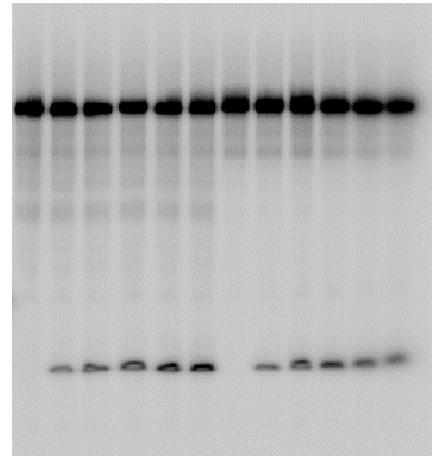

400mM NaCl

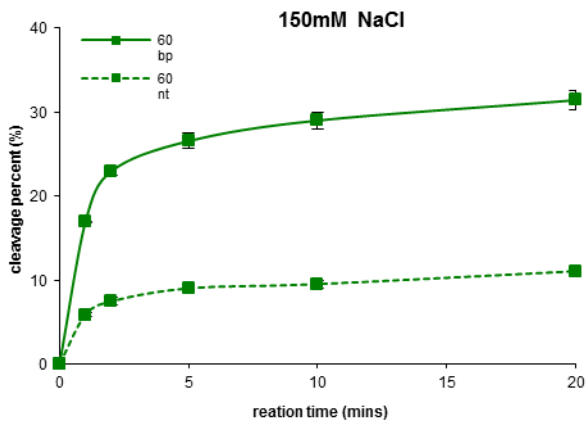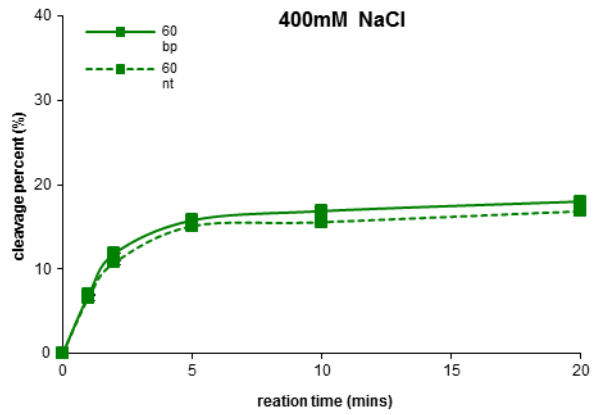

Figure S6

Supplement: supp_gkw661_nar-00934-f-2016-File005.pdf [file supp_gkw661_nar-00934-f-2016-File005.pdf]
